# Supplementary material for: ESIPT-PET based triphenylamine-anthraquinone probe for the detection of phosgene: DFT studies, real-time application in soil samples and test strips
Source: Royal Society of Chemistry journal article supplement (doi:10.1039/d3an00239j), 2023-01-01
Supplement: d3an00239j1.pdf [file d3an00239j1.pdf]

## Supporting Information

### **ESIPT-PET based triphenylamine-anthraquinone probe for the detection of phosgene: DFT studies, real time application in soil samples and test strips**

Ramakrishnan AbhijnaKrishna<sup>a</sup> and Sivan Velmathi<sup>a,\*</sup>

*<sup>a</sup>Department of Chemistry, National Institute of Technology, Tiruchirapalli, 620015, India  
velmathis@nitt.edu*

## Table of Contents

| Fig No | Supplementary Figures                                                                                                      | Page No. |
|--------|----------------------------------------------------------------------------------------------------------------------------|----------|
| S1     | <sup>1</sup> H NMR spectrum (DMSO) of TPAAQ                                                                                | S3       |
| S2     | <sup>13</sup> C NMR spectrum (DMSO) of TPAAQ                                                                               | S3       |
| S3     | HR-Mass spectrum of TPAAQ                                                                                                  | S4       |
| S4     | HR-Mass spectrum of TPAAQ + phosgene                                                                                       | S4       |
| S5     | Absorption study of TPAAQ and TPAAQ + phosgene in different solvents                                                       | S5       |
| S6     | Emission study of TPAAQ and TPAAQ + phosgene in different solvents                                                         | S5       |
| S7     | Selectivity plot of TPAAQ (30 μM) in UV-Vis spectroscopy with 3 equiv. addition of analytes (90 μM) in 1,4-dioxane solvent | S6       |
| S8     | Titration plot of TPAAQ (30 μM) in UV-Vis spectroscopy with addition of phosgene (0-117 μM) in 1,4-dioxane solvent         | S6       |
| S9     | Fluorescence titration plot of TPAAQ (30 μM) with addition of phosgene (0-117 μM) in 1,4-dioxane solvent                   | S7       |
| S10    | Fluorescence change of TPAAQ (30 μM) at 533 nm with and without phosgene as time increases.                                | S7       |
| S11    | DFT Optimized structures of TPAAQ, TPAAQ' and TPAAQ + Phosgene                                                             | S8       |
| S12    | Images of probe solution containing soil treated without (I,III, and V) and with phosgene (II,IV and VI)                   | S8       |
| S13    | Emission changes of the probe at 533nm with different concentration of phosgene pre- treated soil                          | S9       |

## SUPPLEMENTARY FIGURES

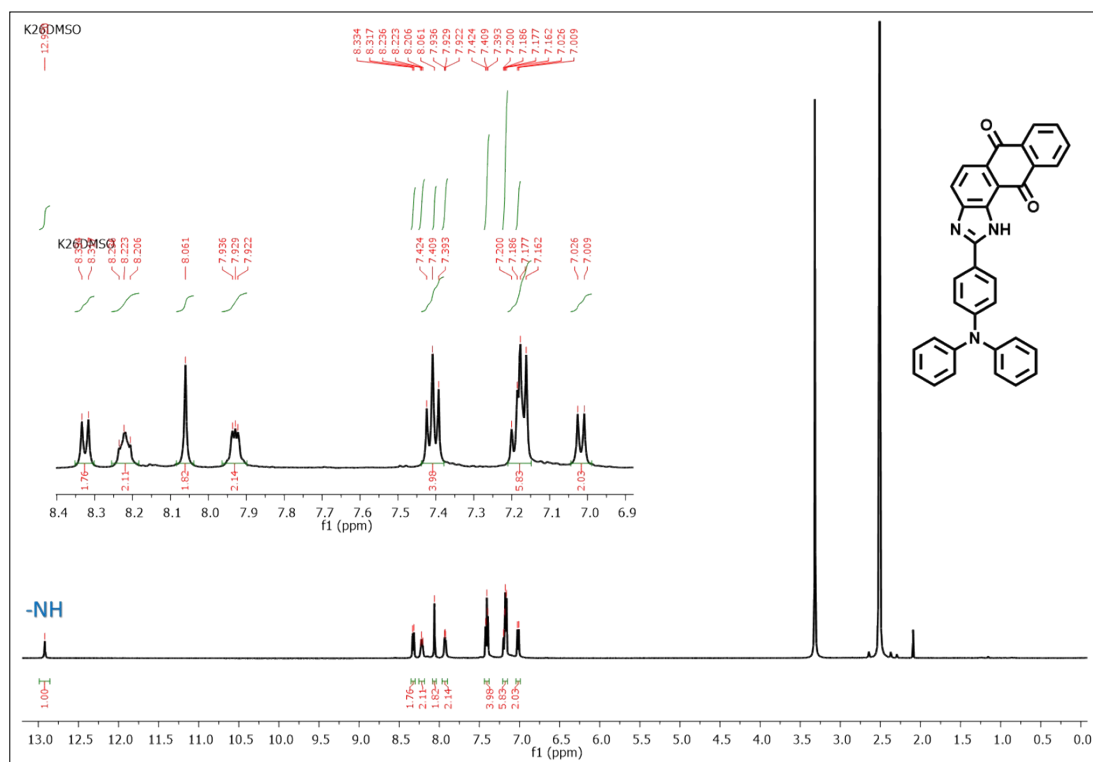

Figure S1. <sup>1</sup>H NMR spectrum (DMSO-d<sub>6</sub>) of TPAAQ

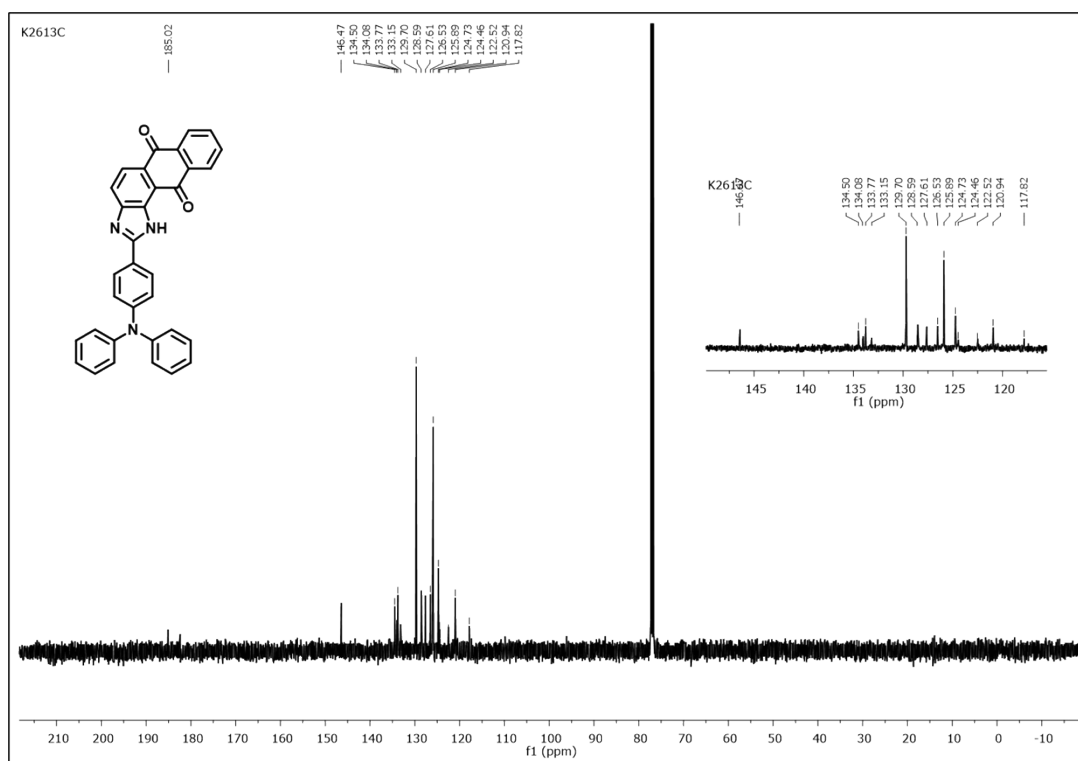

Figure S2. <sup>13</sup>C NMR spectrum (DMSO-d<sub>6</sub>) of TPAAQ

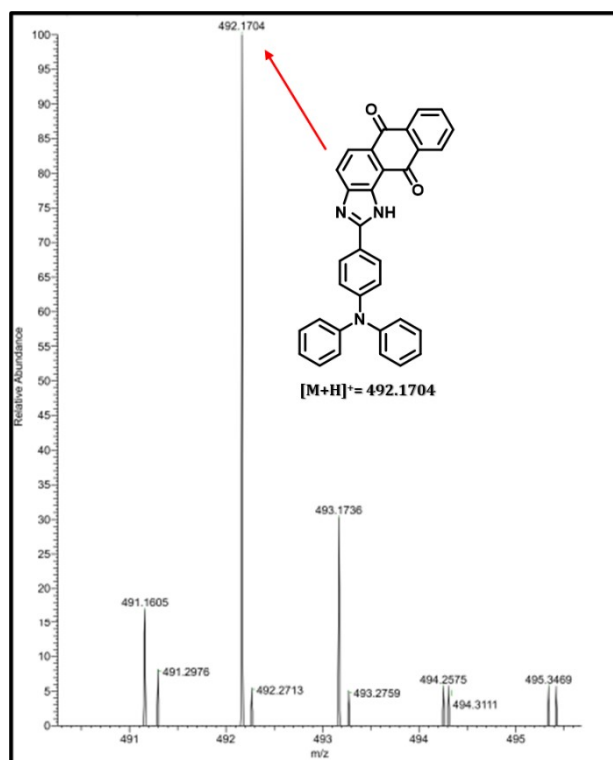

Figure S3. HR-Mass spectrum of TPAAQ

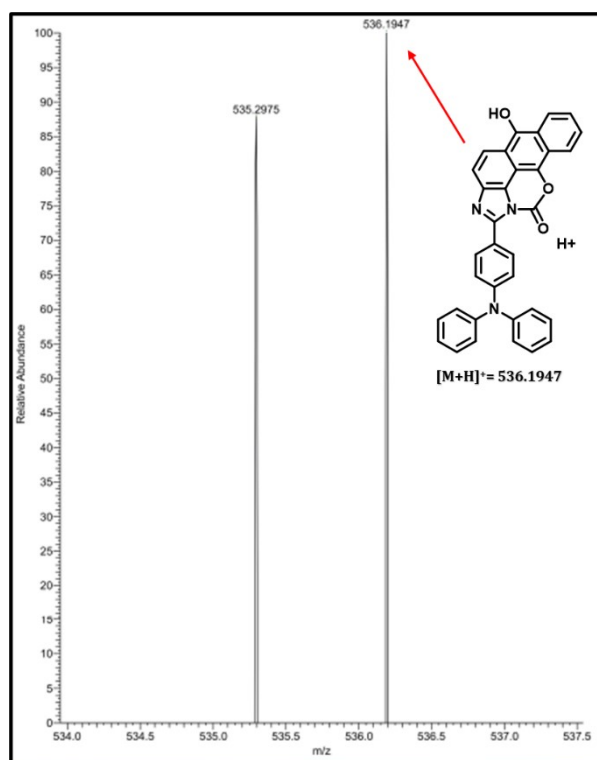

Figure S4. HR-Mass spectrum of TPAAQ + Phosgene

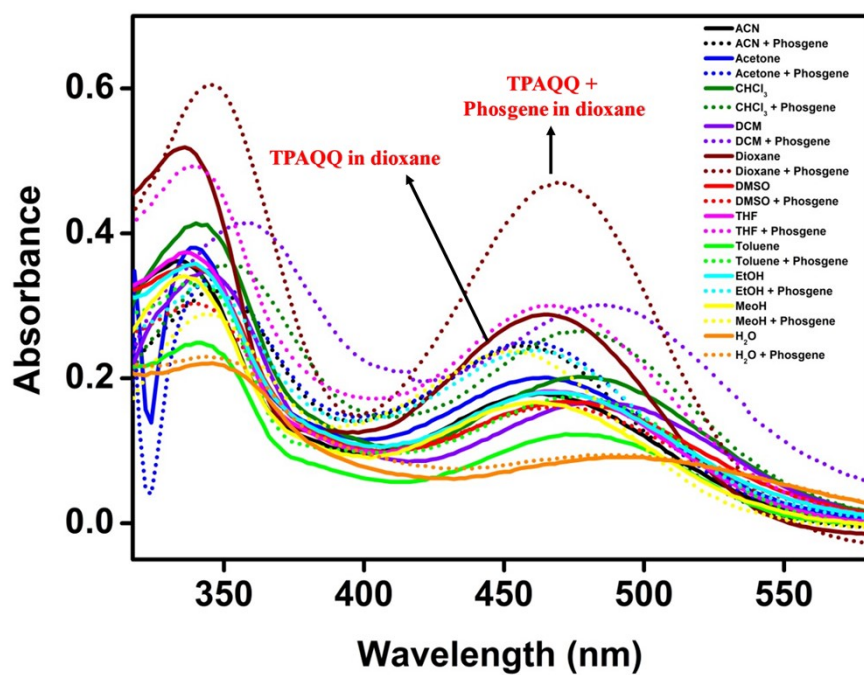

Figure S5. Absorption study of TPAAQ and TPAAQ + Phosgene in different solvents

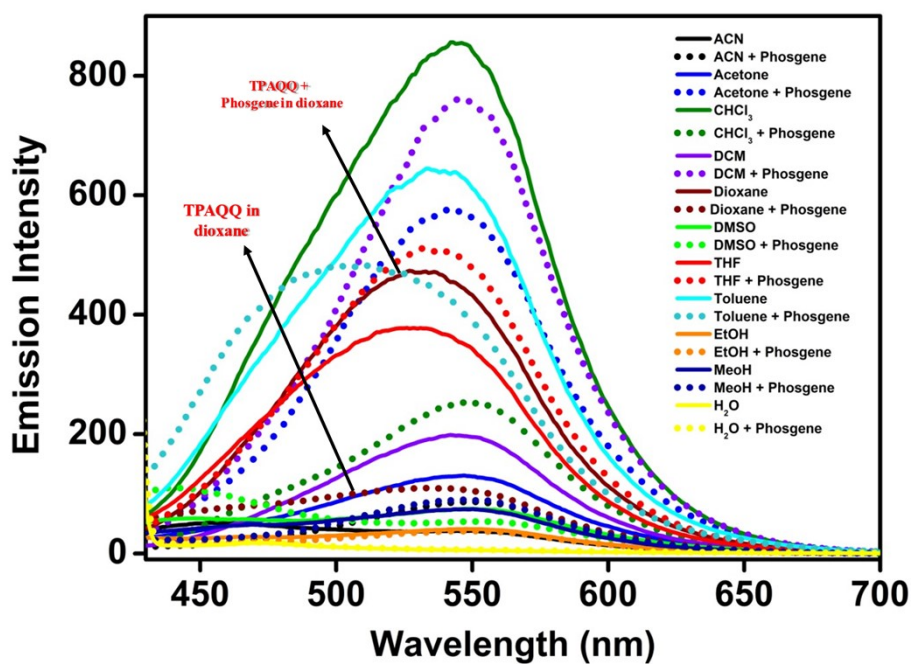

Figure S6. Emission study of TPAAQ and TPAAQ + Phosgene in different solvents

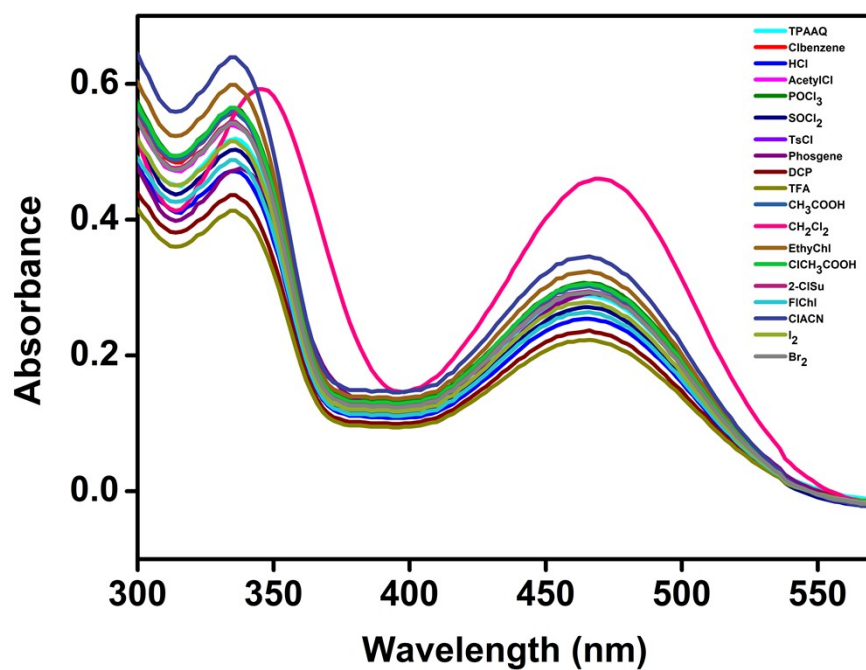

Figure S7. Selectivity plot of TPAAQ (30  $\mu\text{M}$ ) in UV-Vis spectroscopy with 3 equiv. addition of analytes (90  $\mu\text{M}$ ) in 1,4-dioxane solvent

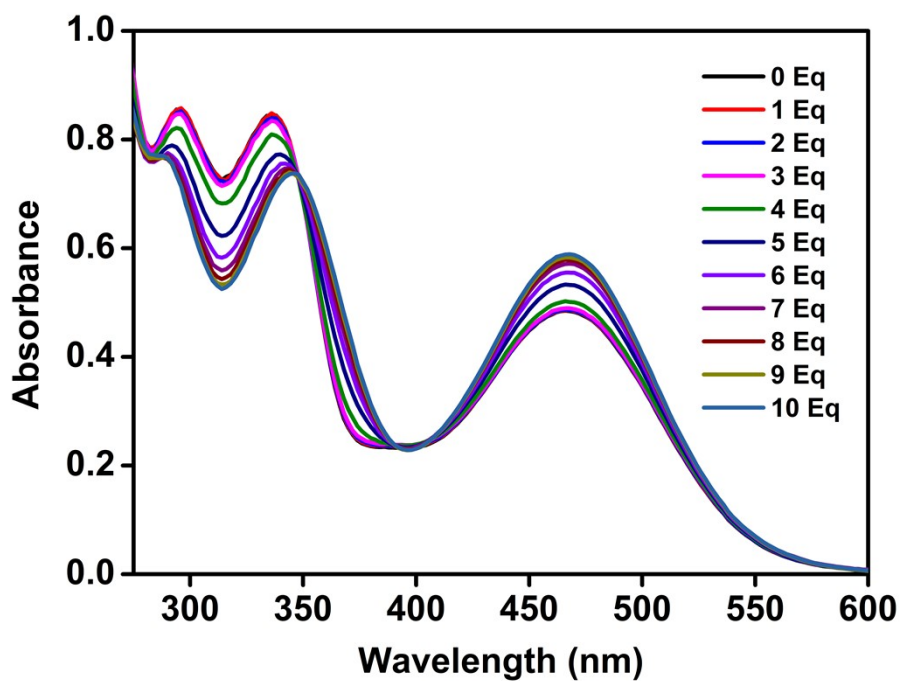

Figure S8. Titration plot of TPAAQ (30  $\mu\text{M}$ ) in UV-Vis spectroscopy with addition of phosgene (0-117  $\mu\text{M}$ ) in 1,4-dioxane solvent

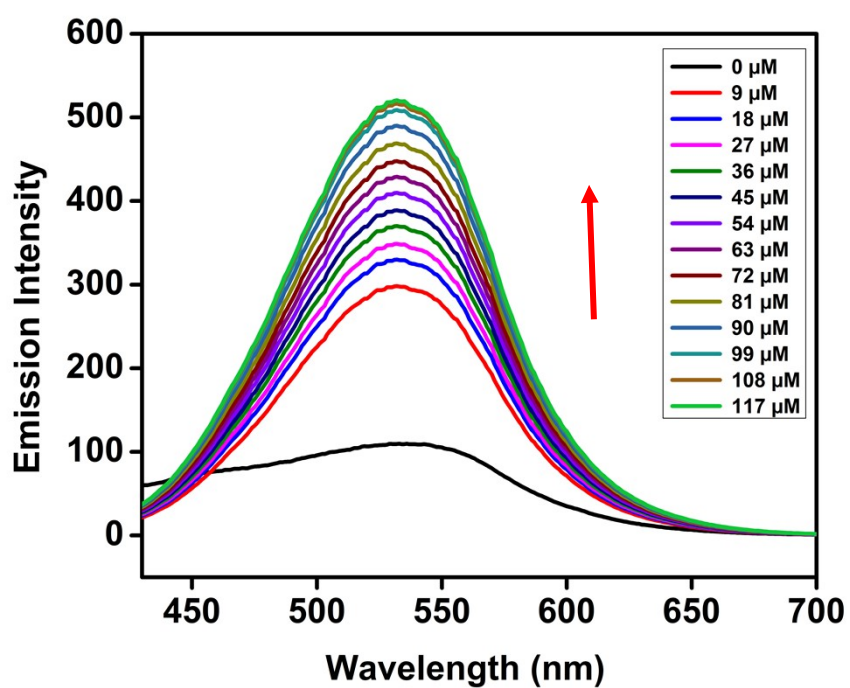

Figure S9. Fluorescence titration plot of TPAAQ (30  $\mu\text{M}$ ) with addition of phosgene (0-117  $\mu\text{M}$ ) in 1,4-dioxane solvent

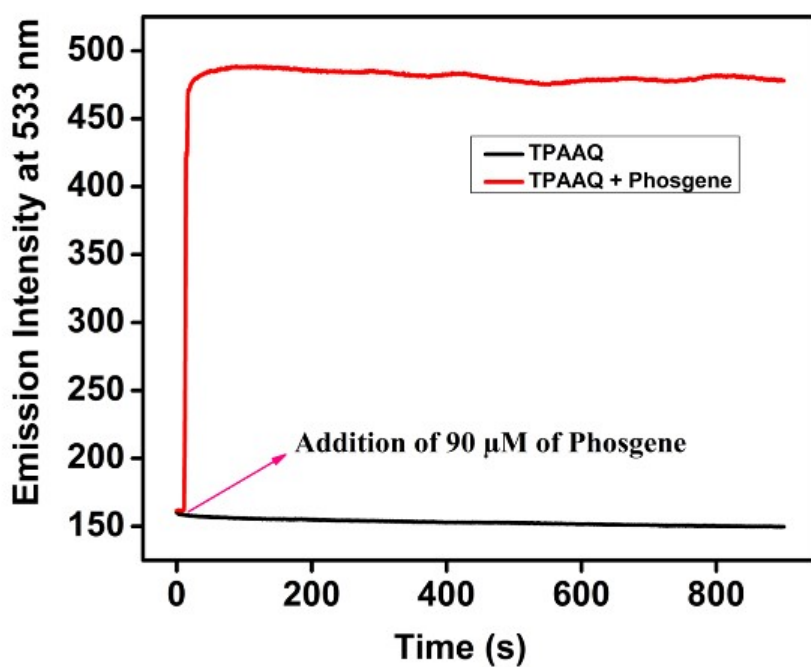

Figure S10. Fluorescence change of TPAAQ (30  $\mu\text{M}$ ) at 533 nm with and without phosgene as time increases.

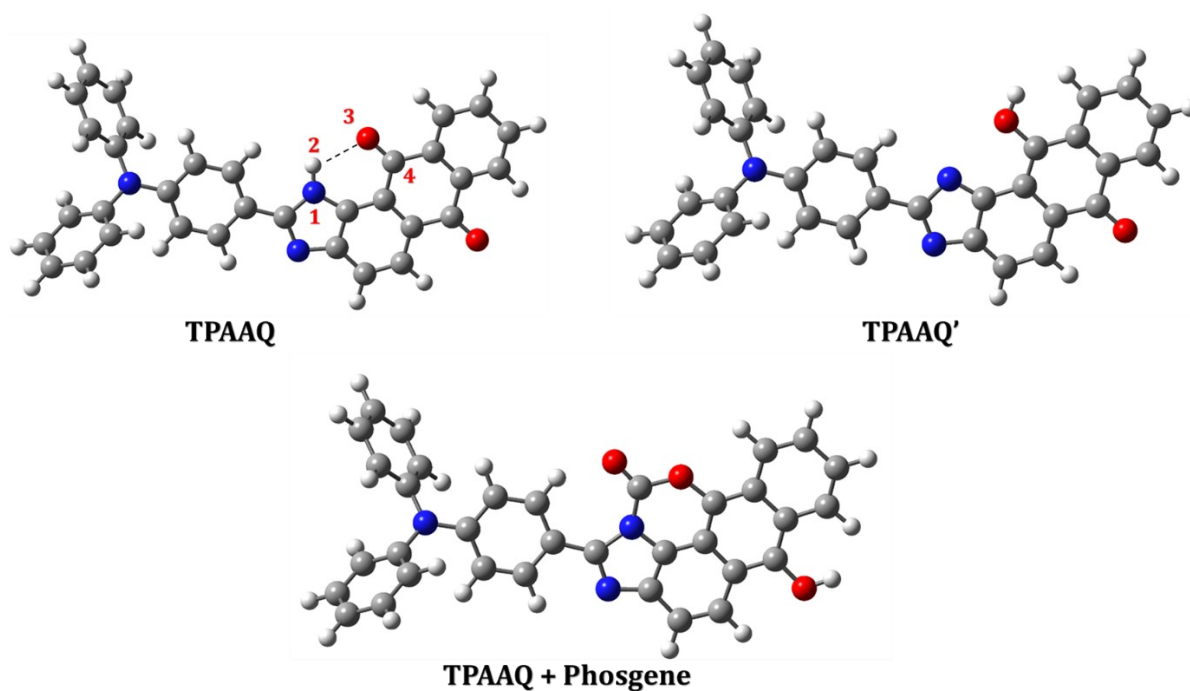

Figure S11. DFT Optimized structures of TPAAQ, TPAAQ' and TPAAQ + Phosgene

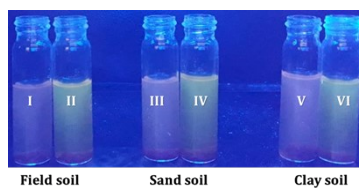

Figure S12. Images of probe solution containing soil treated without (I,III, and V) and with phosgene (II,IV and VI)

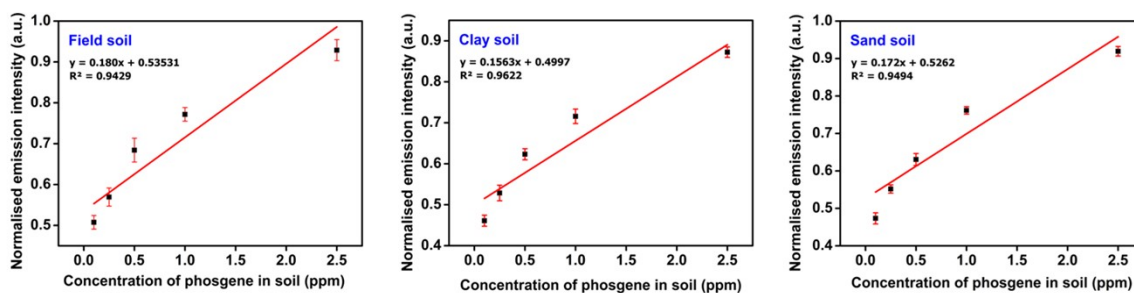

Figure S13. Emission changes of the probe at 533nm with different concentration of phosgene pre-treated soil
